# Supplementary material
Source: Springer Nature journal article supplement (https://www.springermedizin.de/resource/supplementary/12985_2013_2313_MOESM1_ESM.pdf/9606510)

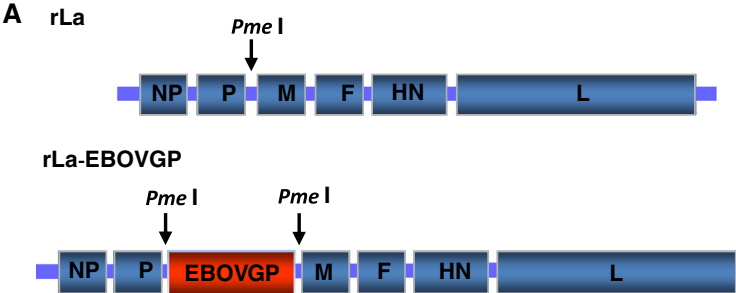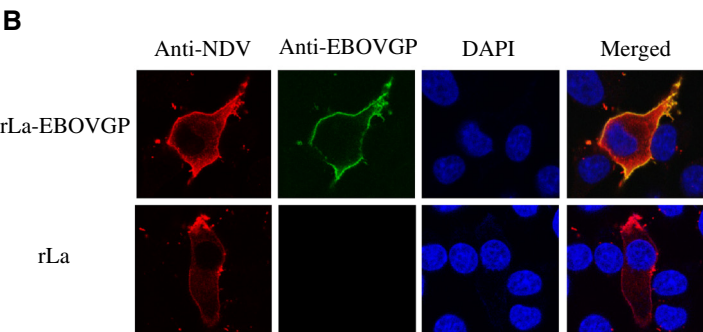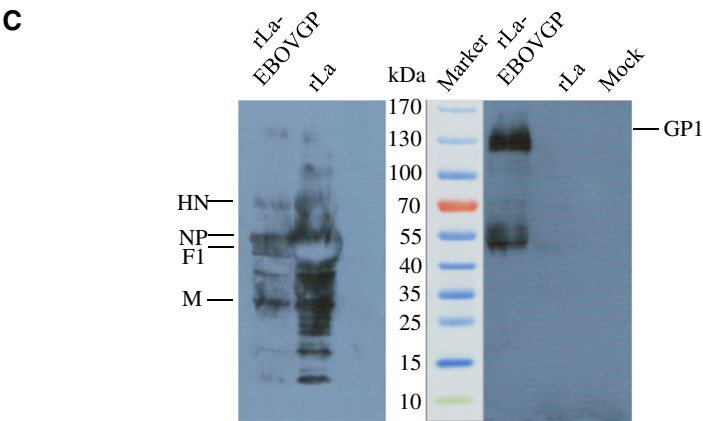

Supplement: MOESM1 [file 9606510]
